# Supplementary material
Source: PubMed Central journal article supplement (PMC11386878)
Supplement: PBI-18-1810-s002.pdf [file PBI-18-1810-s002.pdf]

# **A pathogenesis related protein GmPR10-08 promotes a molecular interaction between the GmSHMT08 and GmSNAP18 in resistance to *Heterodera glycines***

Naoufal Lakhssassi<sup>1</sup>, Sarbottam Piya<sup>2\*</sup>, Sadia Bekal<sup>1\*</sup>, Shiming Liu<sup>1</sup>, Zhou Zhou<sup>1</sup>, Catherine Bergounioux<sup>3</sup>, Long Miao<sup>2</sup>, Jonas Meksem<sup>4</sup>, Aicha Lakhssassi<sup>5</sup>, Karen Jones<sup>1</sup>, My Abdelmajid Kassem<sup>6</sup>, Moussa Benhamed<sup>3</sup>, Abdelhafid Bendahmane<sup>3</sup>, Kris Lambert<sup>7</sup>, Adnane Boualem<sup>3</sup>, Tarek Hewezi<sup>2</sup>, and Khalid Meksem<sup>1</sup>

<sup>1</sup>Department of Plant, Soil and Agricultural Systems, Southern Illinois University, Carbondale, IL 62901, USA.

<sup>2</sup>Department of Plant Sciences, University of Tennessee, Knoxville, TN, 37996. <sup>3</sup>INRA, Institute of Plant Sciences Paris-Saclay (IPS2), CNRS, Université Paris-Sud, Bâtiment 630, 91405, Orsay, France. <sup>4</sup>Duke University, Durham, NC 27708. <sup>5</sup>Faculty of Sciences and Technologies, University of Lorraine, 54506, Nancy, France. <sup>6</sup>Department of Biological Sciences, Fayetteville State University, Fayetteville, NC, 28301, USA. <sup>7</sup>Department of Crop Sciences, University of Illinois, Urbana, IL 61801, USA.

\*These authors contributed equally to the work.

Corresponding author, E-mail: [meksem@siu.edu](mailto:meksem@siu.edu)

**Supplemental Table 1. Genotypes of the soybean lines used for expression analysis and SCN screening.** Soybean PIs, elites, cultivars, and ExF RILs carrying different *GmSHMT08* and *GmSNAP18* haplotype combinations are shown below.

| <b>PIs, elites, cultivars</b> | <b>Country of Origin</b> | <b>MG</b> | <b>Rhg4 (GmSHMT08)</b> | <b>Rhg1 (GmSNAP18)</b> |
|-------------------------------|--------------------------|-----------|------------------------|------------------------|
| ExF 05                        | U.S.                     | V         | GmSHMT08-              | GmSNAP18-              |
| ExF 07                        | U.S.                     | V         | GmSHMT08+              | GmSNAP18+              |
| ExF 24                        | U.S.                     | V         | GmSHMT08-              | GmSNAP18+              |
| ExF 68                        | U.S.                     | V         | GmSHMT08+              | GmSNAP18-              |
| Forrest (Peking-type)         | U.S.                     | V         | GmSHMT08+              | GmSNAP18+              |
| PI548667 (Essex)              | U.S.                     | V         | GmSHMT08-              | GmSNAP18-              |
| PI464920B                     | China                    | III       | GmSHMT08-              | GmSNAP18-              |
| PI087617                      | North Korea              | III       | GmSHMT08-              | GmSNAP18-              |
| PI407184 (Soja)               | South Korea              | IV        | GmSHMT08-              | GmSNAP18-              |
| PI438471 (Fiskeby III)        | Sweden                   | 0         | GmSHMT08-              | GmSNAP18-              |
| PI567690                      | China                    | III       | GmSHMT08-              | GmSNAP18-              |
| PI552538 (Dunbar)             | U.S.                     | III       | GmSHMT08-              | GmSNAP18-              |
| PI518751                      | Former Serbia            | II        | GmSHMT08-              | GmSNAP18-              |
| PI200508                      | Japan                    | I         | GmSHMT08-              | GmSNAP18-              |
| V71-370                       | U.S.                     | VI        | GmSHMT08-              | GmSNAP18-              |
| PI593258 (Macon)              | N/A                      | III       | GmSHMT08-              | GmSNAP18-              |
| PI471938                      | Nepal                    | V         | GmSHMT08-              | GmSNAP18-              |
| IA3023                        | U.S.                     | III       | GmSHMT08-              | GmSNAP18-              |
| S07-5049                      | U.S.                     | IV        | GmSHMT08-              | GmSNAP18-              |
| PI404198B                     | China                    | IV        | GmSHMT08+              | GmSNAP18+              |
| PI468915                      | China                    | II        | GmSHMT08+              | GmSNAP18+              |
| PI090763                      | China                    | IV        | GmSHMT08+              | GmSNAP18+              |
| PI658519 (LD00-2817)          | N/A                      | VII       | GmSHMT08+              | GmSNAP18+              |
| PI548402                      | China                    | IV        | GmSHMT08+              | GmSNAP18+              |
| PI437690                      | China                    | III       | GmSHMT08+              | GmSNAP18+              |
| PI437725                      | China                    | IV        | GmSHMT08+              | GmSNAP18+              |
| PI404166                      | China                    | III       | GmSHMT08+              | GmSNAP18+              |
| PI089772                      | China                    | IV        | GmSHMT08+              | GmSNAP18+              |
| PI437679                      | China                    | IV        | GmSHMT08+              | GmSNAP18+              |
| PI548402 (Peking)             | China                    | IV        | GmSHMT08+              | GmSNAP18+              |
| PI437654                      | China                    | III       | GmSHMT08+              | GmSNAP18+              |
| PI507354                      | Japan                    | I         | GmSHMT08+              | GmSNAP18+              |
| PI567516C                     | China                    | IV        | GmSHMT08-              | GmSNAP18+              |
| PI567336B                     | China                    | IV        | GmSHMT08-              | GmSNAP18+              |
| PI567387                      | China                    | IV        | GmSHMT08-              | GmSNAP18+              |
| PI424608A                     | South Korea              | IV        | GmSHMT08-              | GmSNAP18+              |
| PI424298                      | South Korea              | IV        | GmSHMT08-              | GmSNAP18+              |
| S10-11227                     | U.S.                     | N/A       | GmSHMT08-              | GmSNAP18+              |
| PI407788A                     | South Korea              | IV        | GmSHMT08-              | GmSNAP18+              |
| PI567230                      | China                    | V         | GmSHMT08-              | GmSNAP18+              |
| PI567305                      | China                    | IV        | GmSHMT08-              | GmSNAP18+              |
| PI603497                      | China                    | III       | GmSHMT08-              | GmSNAP18+              |

**Chlorophyll****GmSNAP18****Merge****Forrest**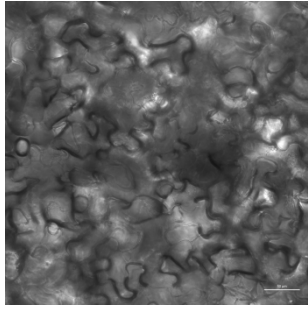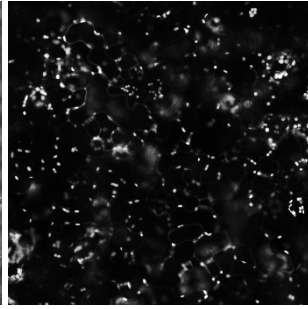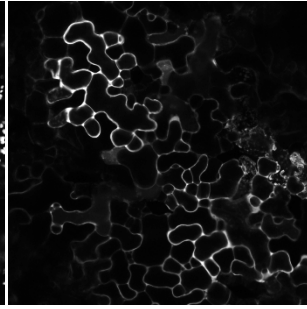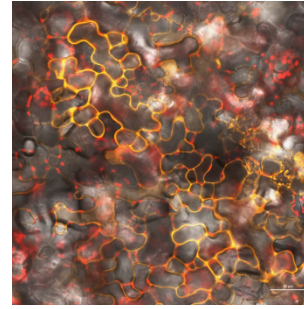**Essex**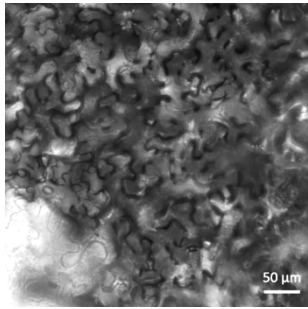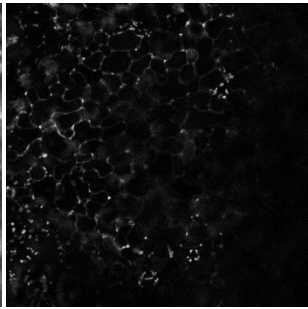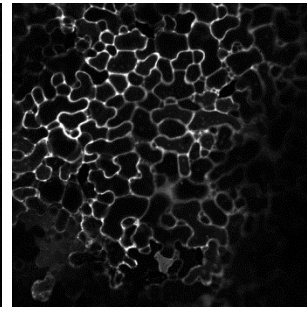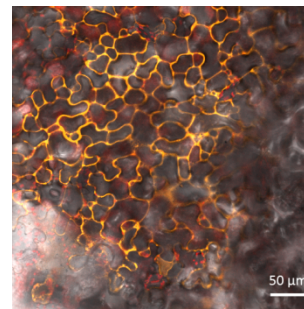

**Supplemental Figure 1. Subcellular localization of the GmSNAP18 and GmSHMT08 proteins.** Maximum intensity projection of confocal fluorescence and brightfield images of *N. benthamiana* leaves transiently expressing GmSNAP18 or GmSHMT08 - RFP fusion proteins from both Essex and Forrest. In the merge section, chlorophyll fluorescence appears in red, GmSNAP18 or GmSHMT08 appear in yellow. Scale bar corresponds to 50 $\mu$ m.

**Chlorophyll****GmSHMT08****Merge****Forrest**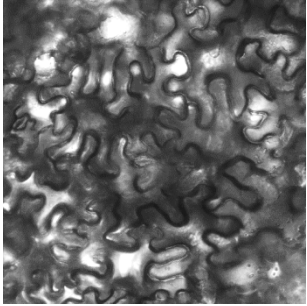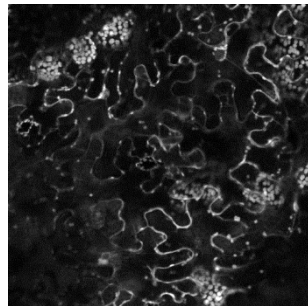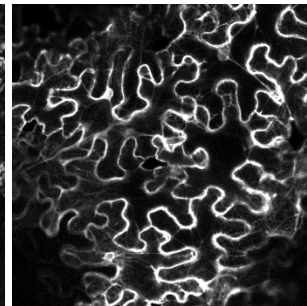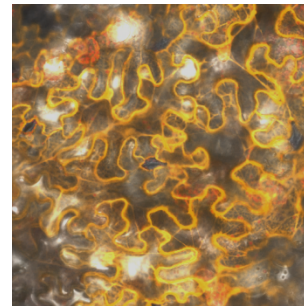**Essex**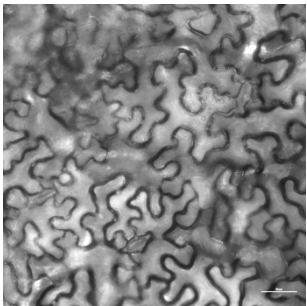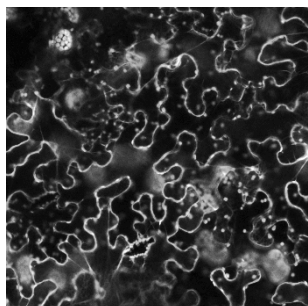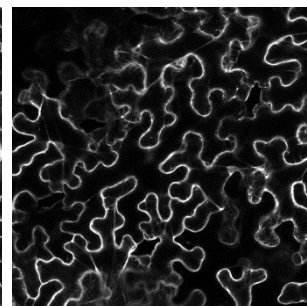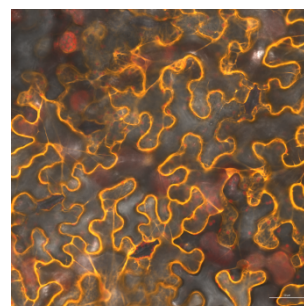



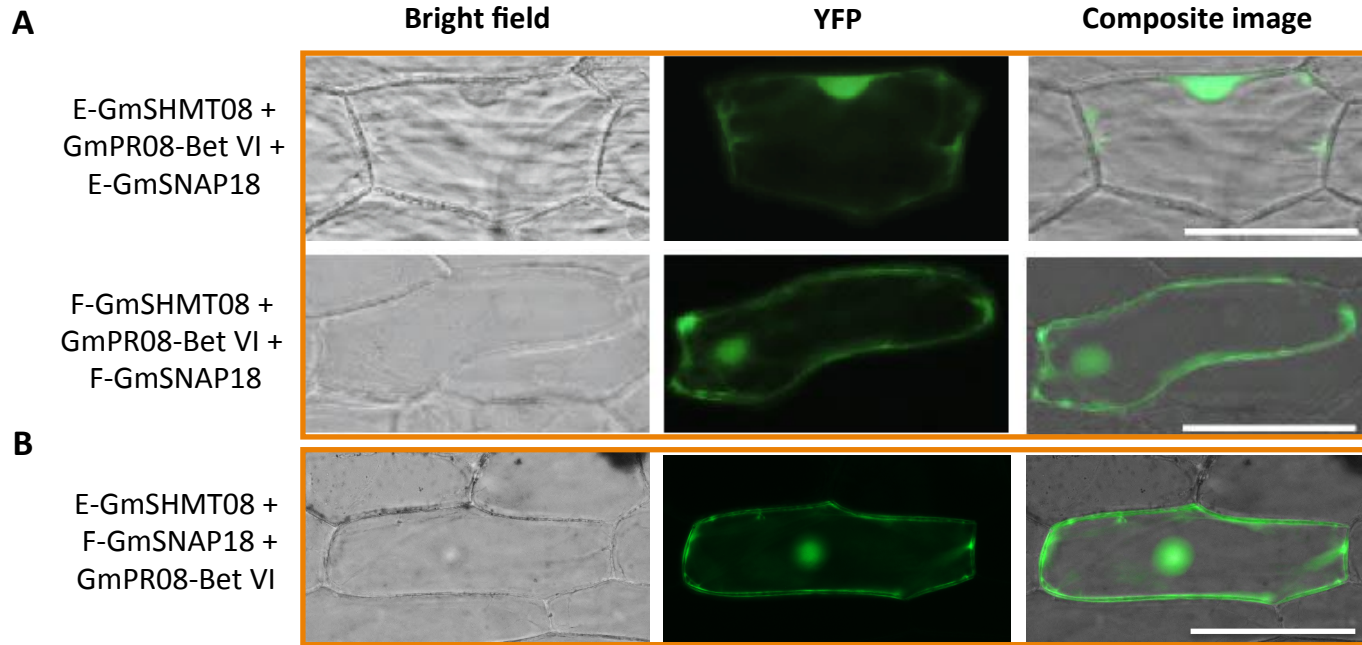

**Supplemental Figure 3. BiFC analysis between GmSNAP18, GmSHMT08, and GmPR08-Bet VI from Forrest and Essex.** (A) The coding sequence of Forrest and Essex *GmSHMT08* wild-type were cloned into *pSAT4-nEYFP-C1* (E81) to generate *nEYFP-GmSHMT08* fusions. Likewise, *GmSNAP18* from Forrest and Essex wild-type and *GmPR08-Bet VI* coding sequences were cloned into *pG2RNAi2* and *pSAT4-cEYFP-C1-B* (E812) to generate *pG2RNAi2-GmSNAP18* and *cEYFP-GmPR08-Bet VI* fusions. (B) *nEYFP-E-GmSHMT08*, *cEYFP-F-GmSNAP18*, and *pG2RNAi2-GmPR08-Bet VI*. Various combinations of cEYFP and nEYFP fusions including controls (Figure S10) were co-expressed in onion epidermal cells by particle bombardment. Bar = 200  $\mu$ M.

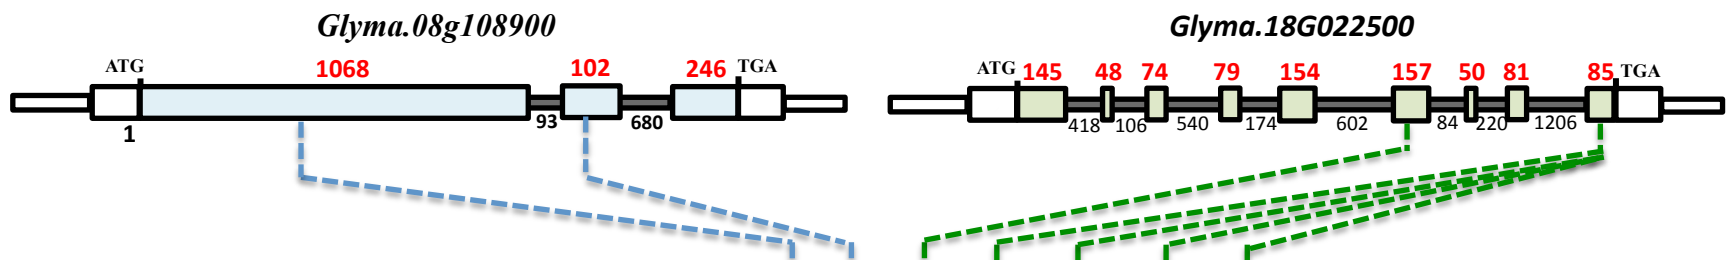

| PI, Elite, Cultivar | SCN races |       | GmSHMT08 (AA) |     | SNAP (AA) |     |     |        |     |
|---------------------|-----------|-------|---------------|-----|-----------|-----|-----|--------|-----|
|                     | HG0       | HG2.7 | 200           | 459 | 208       | 286 | 287 | Insert | 288 |
| PI404198B           | 1         | 12    | R             | H   | E         | Y   | E   | V      | I   |
| PI468915            | 1         | 5     | R             | H   | E         | Y   | E   | V      | I   |
| PI090763            | 2         | 2     | R             | Y   | E         | Y   | E   | V      | I   |
| PI658519            | 1         | 2     | R             | Y   | E         | Y   | E   | V      | I   |
| PI548402            | 2         | 4     | R             | Y   | E         | Y   | E   | V      | I   |
| PI437690            | 2         | 4     | R             | Y   | E         | Y   | E   | V      | I   |
| PI437725            | 2         | 3     | R             | Y   | E         | Y   | E   | V      | I   |
| PI404166            | 1         | 1     | R             | Y   | E         | Y   | E   | V      | I   |
| PI089772            | 1         | 1     | R             | Y   | E         | Y   | E   | V      | I   |
| PI437679            | 1         | 2     | R             | Y   | E         | Y   | E   | V      | I   |
| PI548402            | 1         | 12    | R             | Y   | E         | Y   | E   | V      | I   |
| PI437654            | 1         | 2     | R             | Y   | E         | Y   | E   | V      | I   |
| PI507354            | 2         | 6     | R             | Y   | E         | Y   | E   | V      | I   |
| Forrest             | 3         | 5     | R             | Y   | E         | Y   | E   | V      | I   |
| PI567516C           | 15        | 2     | P             | N   | E         | Y   | E   | V      | I   |
| PI567336B           | 34        | 1     | P             | N   | E         | Y   | E   | V      | I   |
| PI567387            | 59        | 4     | P             | N   | E         | Y   | E   | V      | I   |
| PI424608A           | 54        | 5     | P             | N   | E         | Y   | E   | V      | I   |
| PI424298            | 68        | 11    | P             | N   | E         | Y   | E   | V      | I   |
| S10-11227           | 16        | 3     | P             | N   | E         | Y   | E   | V      | I   |
| PI407788A           | 64        | 5     | P             | N   | E         | Y   | E   | V      | I   |
| PI567230            | 44        | **    | P             | N   | E         | Y   | E   | V      | I   |
| PI567305            | 22        | 1     | P             | N   | E         | Y   | E   | V      | I   |
| PI603497            | 60        | 5     | P             | N   | E         | Y   | E   | V      | I   |
| PI464920B           | 46        | 65    | P             | N   | D         | D   | D   | -      | L   |
| PI087617            | 66        | 103   | P             | N   | D         | D   | D   | -      | L   |
| PI407184            | 60        | 70    | P             | N   | D         | D   | D   | -      | L   |
| PI438471            | 80        | 122   | P             | N   | D         | D   | D   | -      | L   |
| PI567690            | 76        | 86    | P             | N   | D         | D   | D   | -      | L   |
| PI552538            | 69        | 86    | P             | N   | D         | D   | D   | -      | L   |
| PI518751            | 52        | 84    | P             | N   | D         | D   | D   | -      | L   |
| PI200508            | 90        | 100   | P             | N   | D         | D   | D   | -      | L   |
| V71-370             | 62        | 89    | P             | N   | D         | D   | D   | -      | L   |
| PI593258            | 54        | 73    | P             | N   | D         | D   | D   | -      | L   |
| PI471938            | 66        | 84    | P             | N   | D         | D   | D   | -      | L   |
| IA3023              | 58        | 70    | P             | N   | D         | D   | D   | -      | L   |
| S07-5049            | 62        | 82    | P             | N   | D         | D   | D   | -      | L   |
| Essex               | 74        | 68    | P             | N   | D         | D   | D   | -      | L   |
| W82                 | 78        | 75    | P             | N   | D         | D   | D   | -      | L   |

GmSHMT08<sup>+</sup>/GmSNAP18<sup>+</sup>  
GmSHMT08<sup>-</sup>/GmSNAP18<sup>+</sup>  
GmSHMT08<sup>-</sup>/GmSNAP18<sup>-</sup>

**Supplemental Figure 4. Haplotype analysis of the soybean PI, Elite, and cultivars used for SCN screening.** Soybean lines carrying the different combinations of *GmSHMT08*<sup>+/-</sup> and *GmSNAP18*<sup>+/-</sup> are shown (Patil et al., 2019). Lines carrying the *GmSHMT08*<sup>-</sup>/*GmSNAP18*<sup>+</sup> lost their SCN resistance to HG0, but maintained their resistance to HG2.7. Female Index in blue represents soybeans resistant to SCN (FI < 10), in green lines with moderate resistance (10 < FI < 30), in orange lines with moderate susceptibility (31 < FI < 60), and in white lines susceptible to SCN (61 < FI).

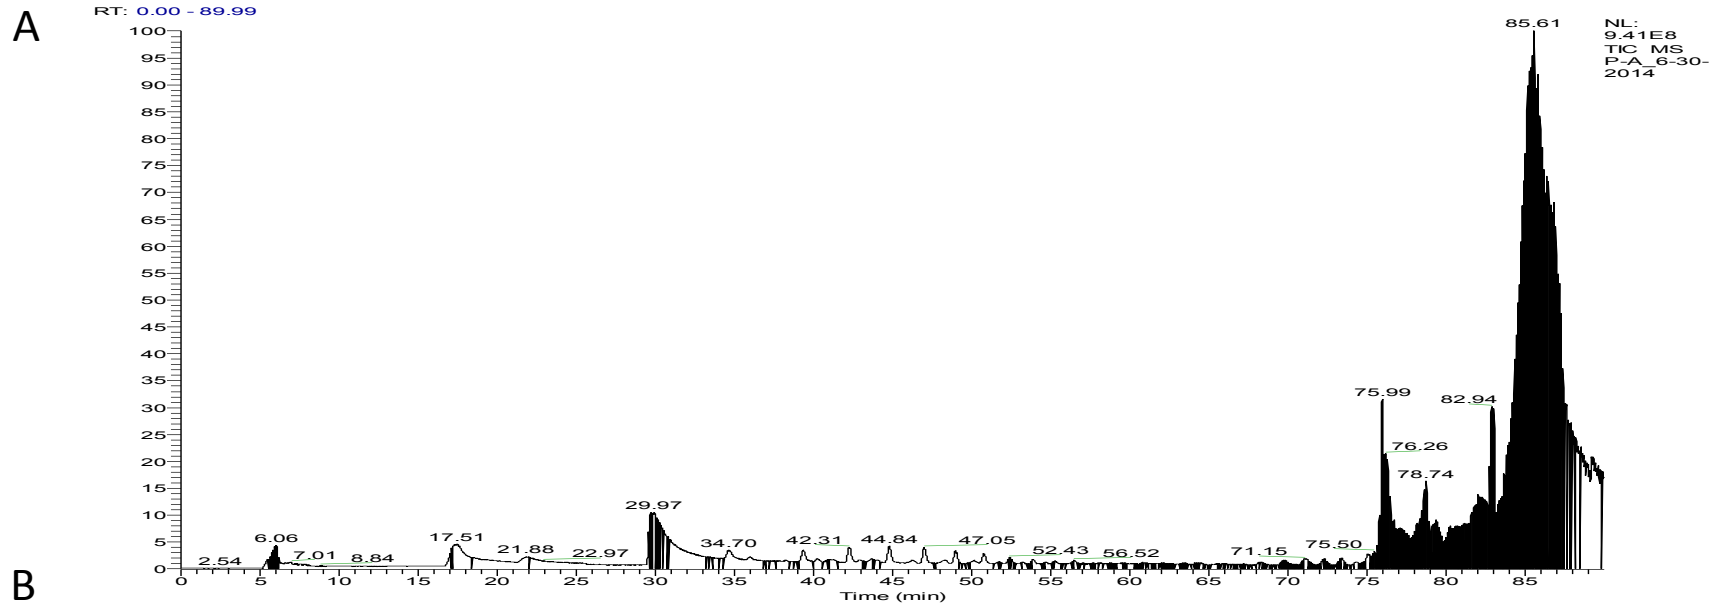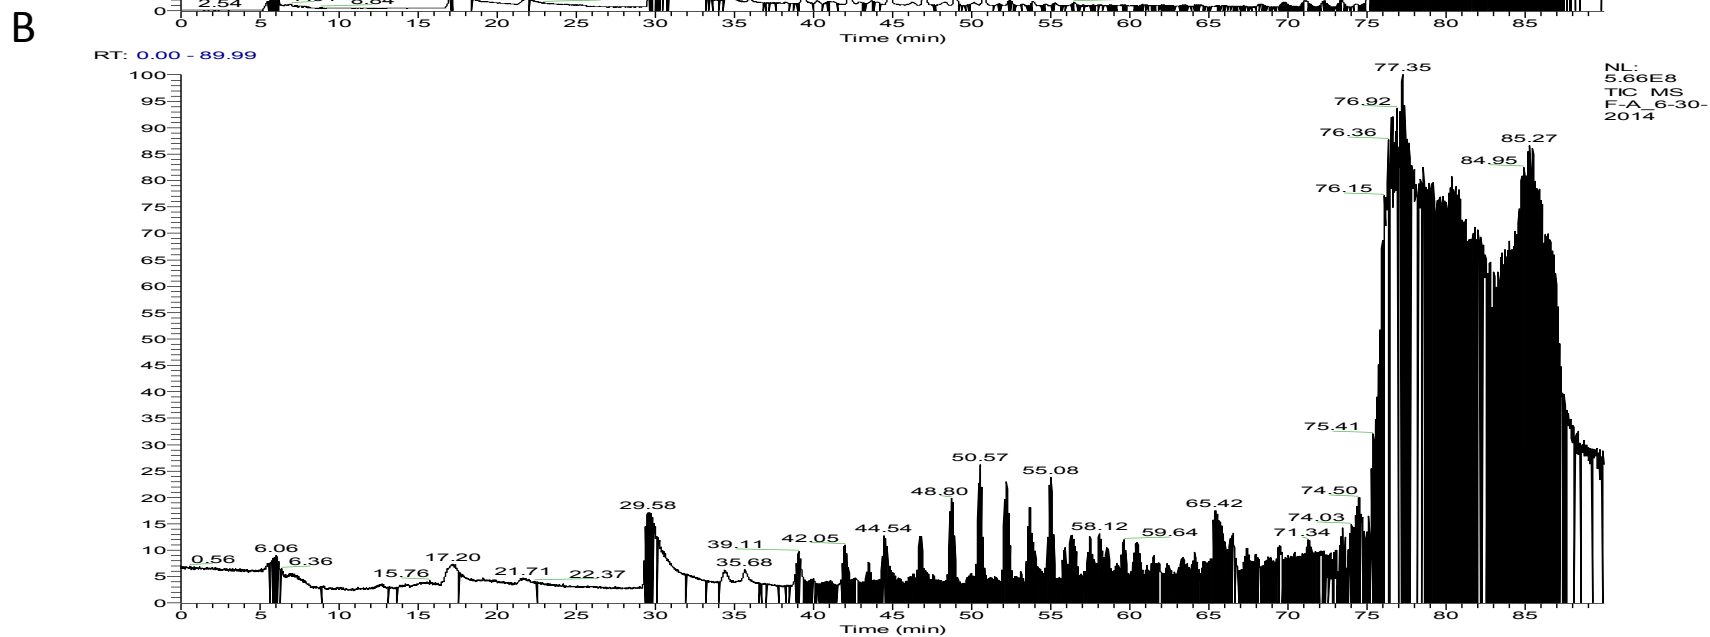

**Supplemental Figure 5. Identification of the GmPR08-Bet VI by mass spectrometry.** (A) and (B) represent LC-MS protein identification of the eluted fraction obtained from the Co-immunoprecipitation using immobilized anti-SHMT08 polyclonal antibodies. Total ion chromatograms showing signal intensity and separation. (A) Non infected soybean root samples from Forrest (B) SCN infected root samples from Forrest. Non infected soybean roots present a very weak signal in the “heart” of the gradient (35-70min). The SCN-infected soybean sample contains more proteins than the control.

**A**

| Gene Annotation                                  | Protein name in Glycine max                | Protein accession | Database sources | Protein (Da) | Probability | Peptide sequence       |
|--------------------------------------------------|--------------------------------------------|-------------------|------------------|--------------|-------------|------------------------|
| <b>Glyma.08G230500</b><br><b>(GmPR08-Bet VI)</b> | Pathogenesis-Related Protein Bet VI family | gi 255627117      | NCBI_Gmax.fasta  | 17.762,10    | 100,00%     | FIFQAIDDNDHGGTIK       |
|                                                  | Pathogenesis-Related Protein Bet VI family | gi 255627117      | NCBI_Gmax.fasta  | 17.762,10    | 100,00%     | ITTEIGVHATATK          |
|                                                  | Pathogenesis-Related Protein Bet VI family | gi 255627117      | NCBI_Gmax.fasta  | 17.762,10    | 100,00%     | LFSGDIDHNYKNFK         |
|                                                  | Pathogenesis-Related Protein Bet VI family | gi 255627117      | NCBI_Gmax.fasta  | 17.762,10    | 100,00%     | WFNLFATQLHHVQNLDR      |
|                                                  | Pathogenesis-Related Protein Bet VI family | gi 255627117      | NCBI_Gmax.fasta  | 17.762,10    | 100,00%     | WFNLFATQLHHVQNLDRVHGTK |

**B**

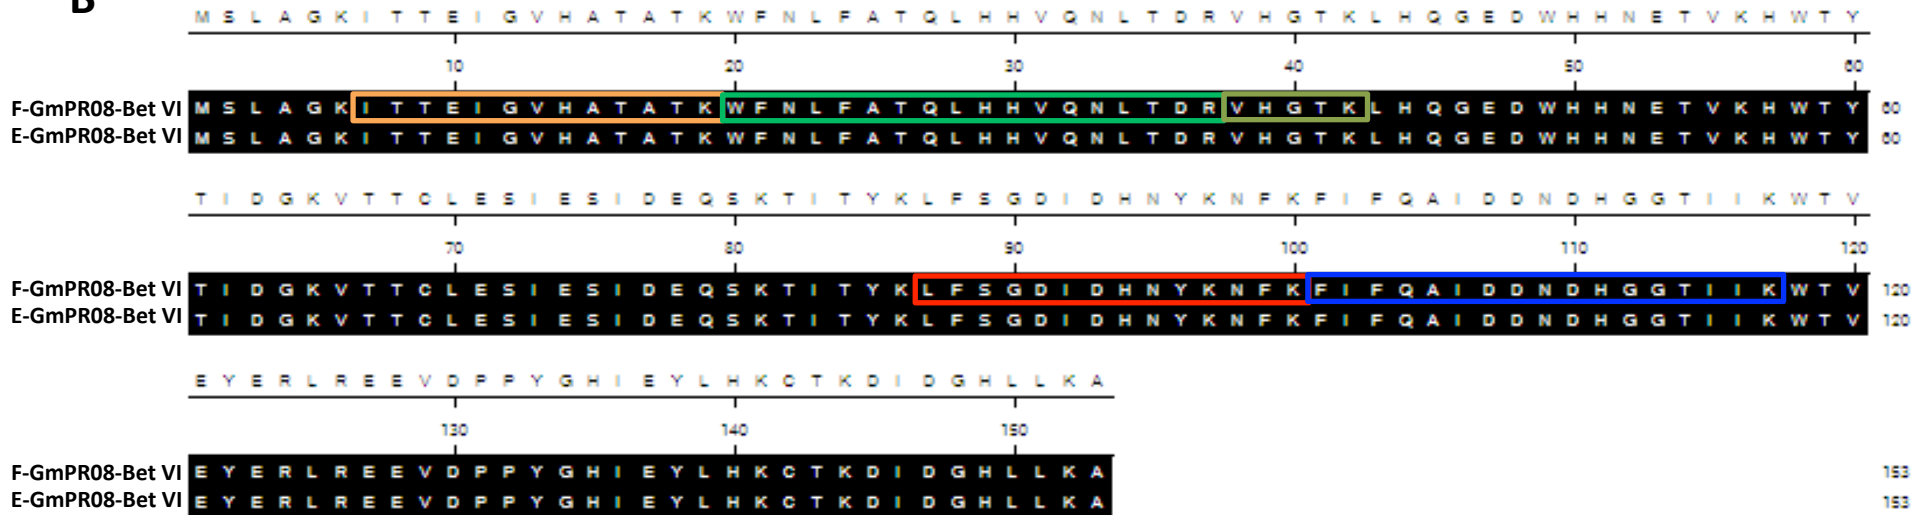

**Supplemental Figure 6. Immunoprecipitation of the GmPR08-Bet VI protein by GmSHMT08.** LC-MS protein identification of the eluted fraction obtained by immunoprecipitation using immobilized anti-SHMT08 polyclonal antibodies. **(A)** Fragmented peptides identified by LC-MS in SCN infected root samples from Forrest **(B)** Alignment of the GmPR08-Bet VI protein sequence showing the five identified fragmented peptides by LC-MS. E, Essex; F, Forrest.



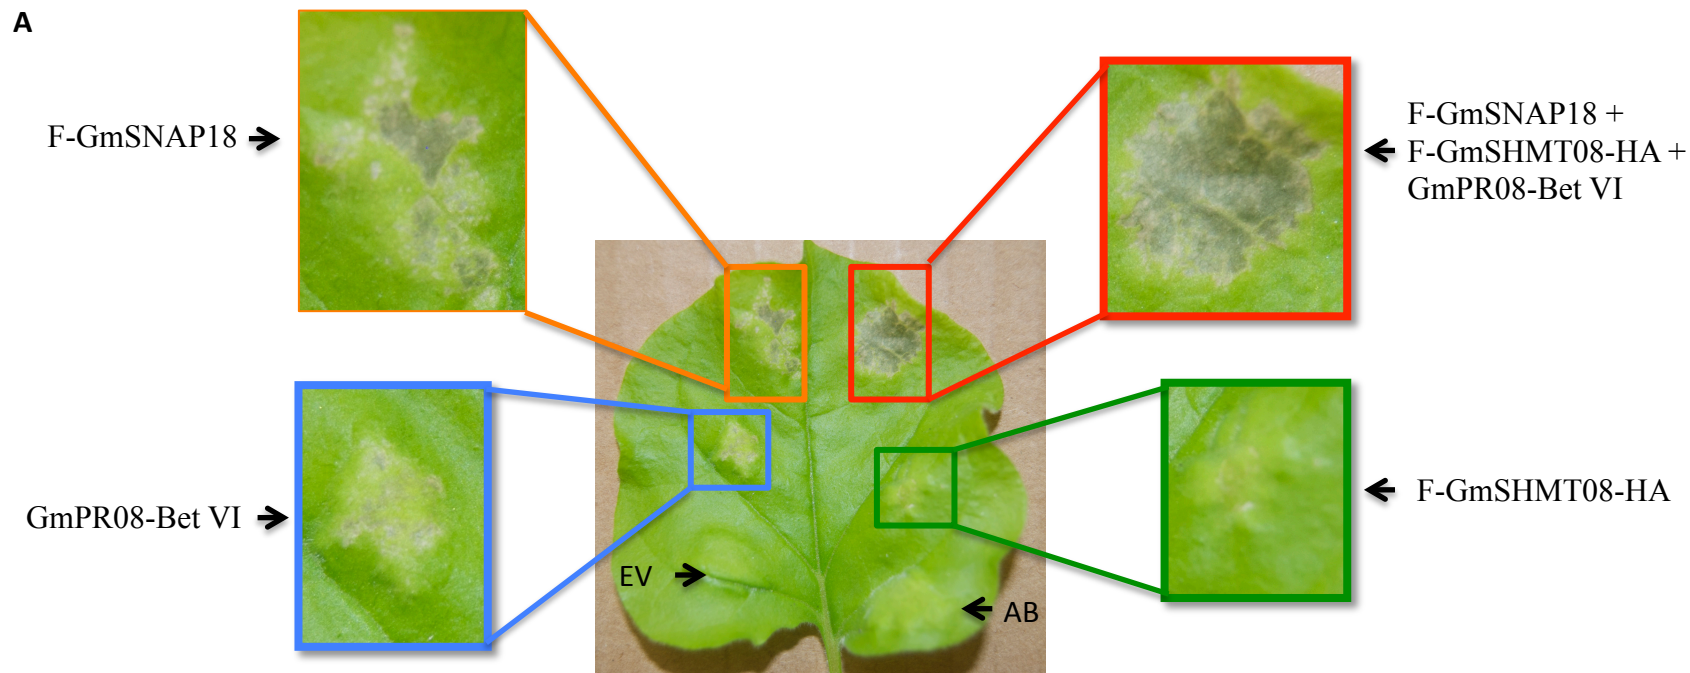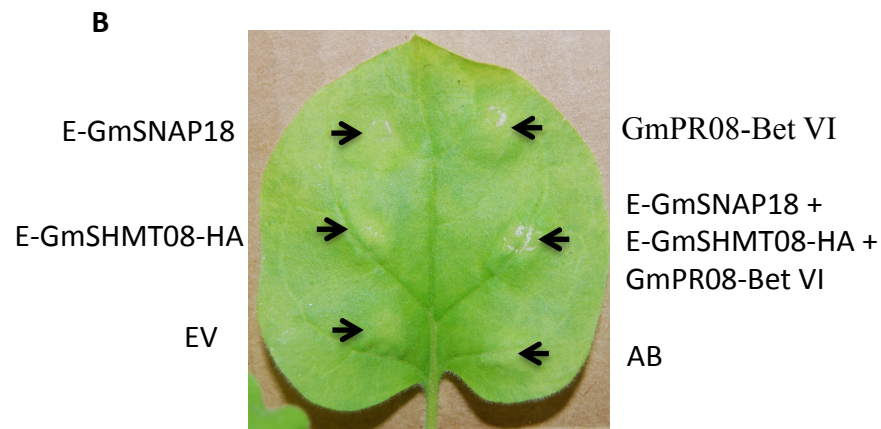

**Supplemental Figure 7. Cell-death and necrosis symptoms intensified in *N. benthamiana* when the three *GmSNAP18*, *GmSHMT08*, and *GmPR08-Bet VI* genes were co-agroinfiltrated.** The *Agrobacterium* mixture containing the constructs p35S-pGWB-*GmSNAP18*, p35S-pGWB-*GmSHMT08-HA*, and/or p35S-pGWB-*PR08-Bet VI* were mixed with the *P19* (suppression of gene silencing), and then incubated for 4 hours at 28°C before infiltration. **(A)** and **(B)** *N. benthamiana* leaves after 5 days were co-agroinfiltrated to express either the indicated *GmSNAP18*, *GmSHMT08*, and/or *GmPR08-Bet VI* from Essex or Forrest. **(A)** Cell-death and necrosis symptoms caused when the three proteins were expressed together were also intensified when compared to single infiltrations. **(B)** Cell-death symptoms were very limited in Essex. E, Essex; F, Forrest; EV, Empty pGWB vector; AB, Agro-infiltration Buffer.

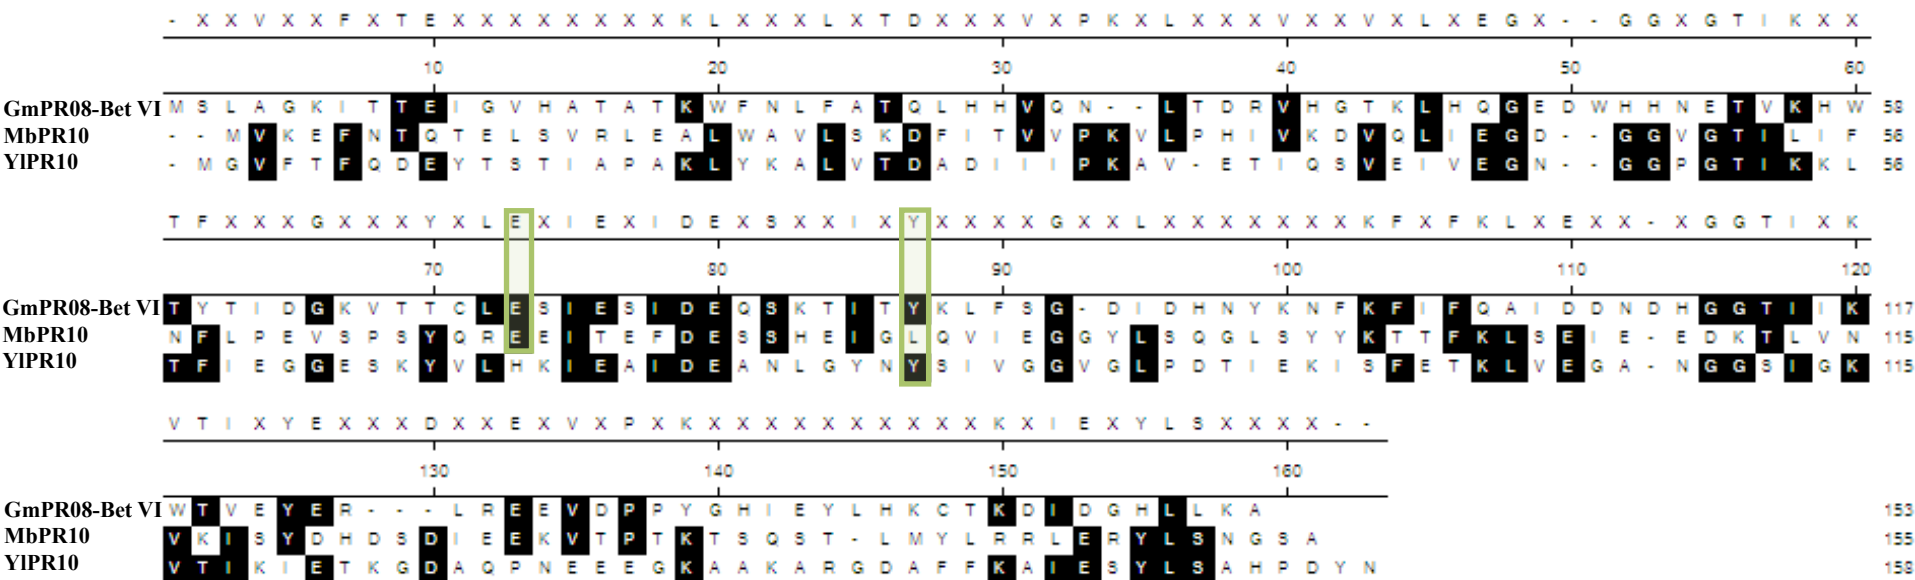

**Supplemental Figure 8. Comparative analysis of the conserved Cytokinin (zeatin) binding sites residues at the GmPR08-Bet VI from *Glycine max*, MbPR10 (2FLH) from Mung bean, and a YIPR10 (2QIM) from Yellow lupine.** The alignment analysis shows that the two zeatin binding sites; glutamic acid E71 and tyrosine Y85 residues are also conserved in GmPR08-Bet VI (Green box), suggesting that GmPR08-Bet VI may bind cytokinins similarly to the MbGmPR10 and YlGmPR10.



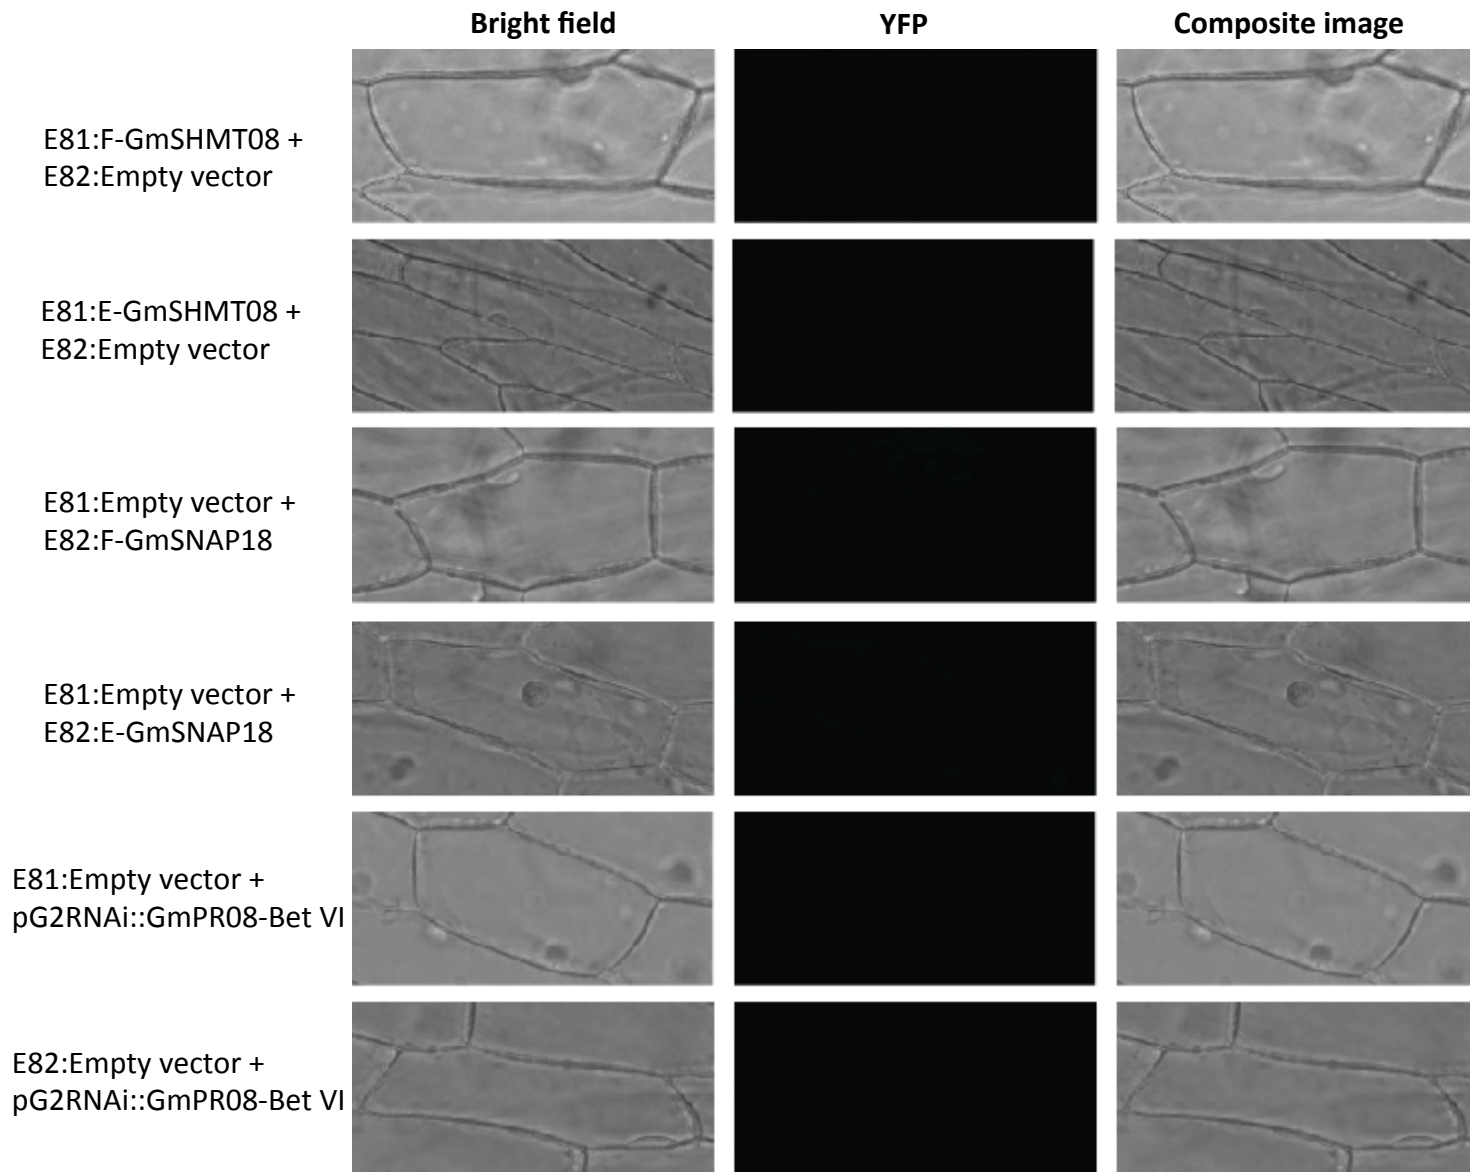

**Supplemental Figure 10. Negative controls of the BiFC analysis.** Each of the cloned GmSNAP18 and GmSHMT08 in the *pSAT4-nEYFP-C1* (E81) were tested in the presence of the *pSAT4-cEYFP-C1-B* (E82) and/or *pG2RNAi2* empty vectors used on the BiFC analysis in Figures 7 and S3. Various combinations of cEYFP and nEYFP fusions including controls were co-expressed in onion epidermal cells by particle bombardment under the same conditions and experiments.

*GmSAMT1.02*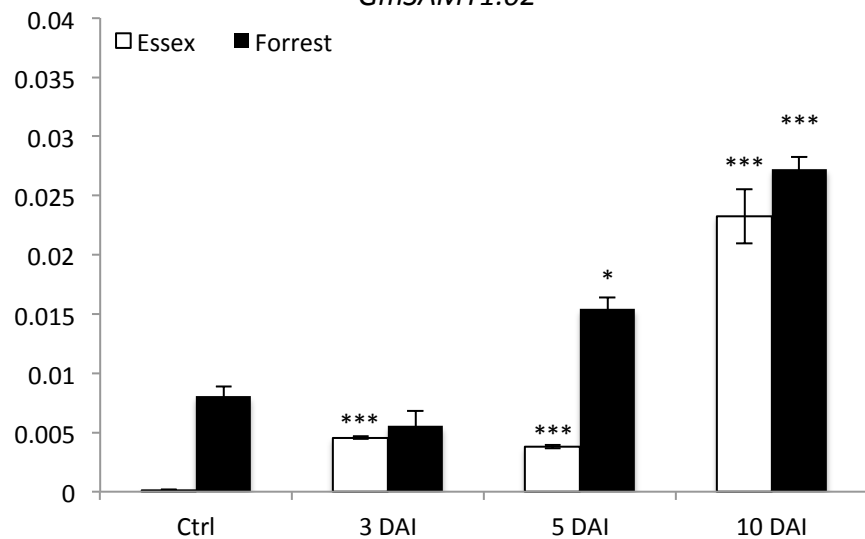*GmTGA2.13*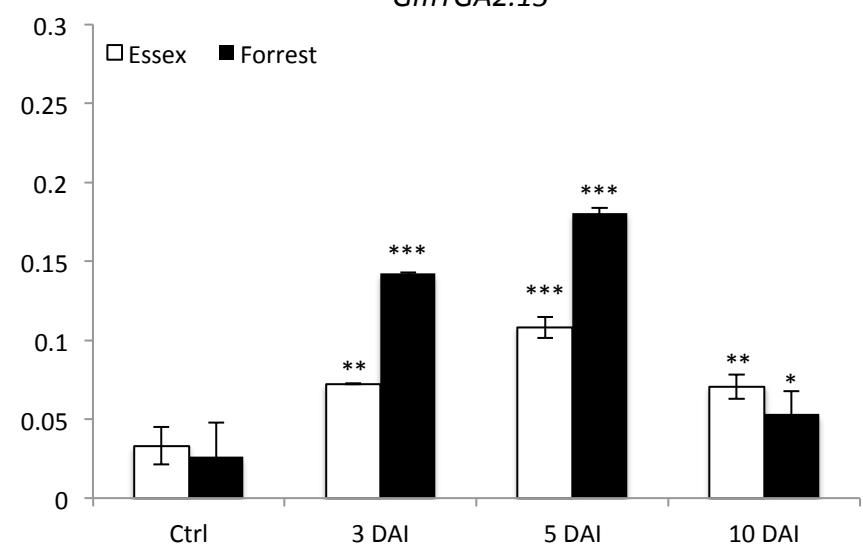*GmNPR1.09*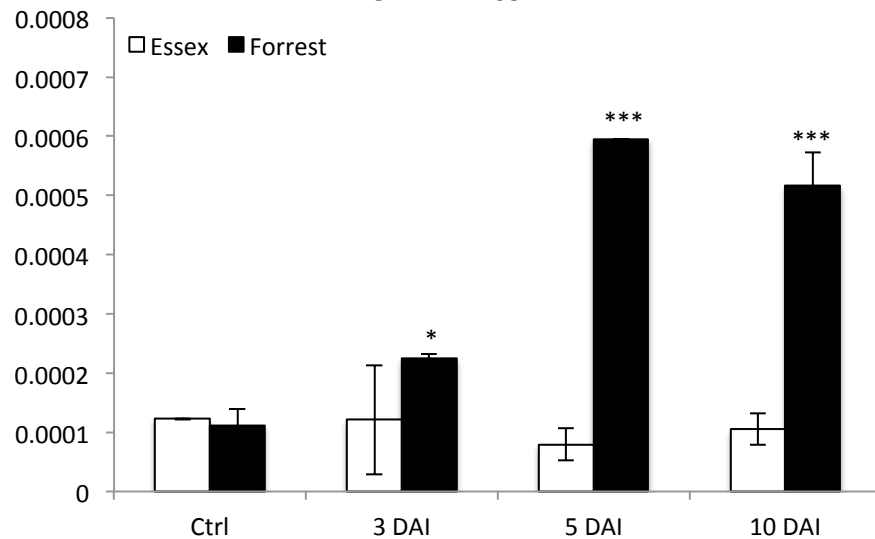*GmNPR1.2.15*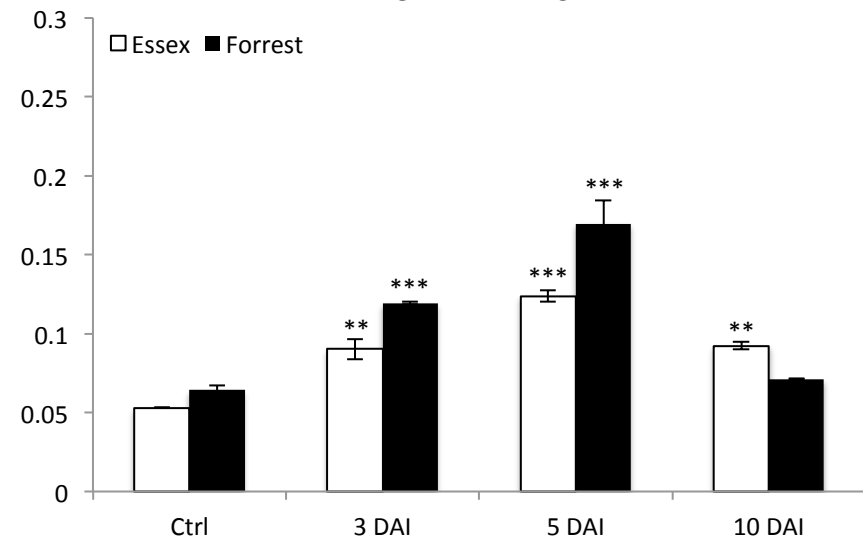

**Supplemental Figure 11.** Expression analysis of components of the SA signaling pathway reveals that all tested genes are co-regulated in root cells undergoing nematode infection. Transcripts of genes encoding key components of the salicylic acid signaling pathway including the S-adenosyl-L-methionine-dependent salicylic acid methyltransferase (*GmSAMT1.02*), the transcription factor (*GmTGA2.13*), and the two non-inducible pathogenesis-related 1 (*GmNPR1.09* and *GmNPR1.2.15*) were induced and more abundant under SCN infection in the resistant line Forrest than in the susceptible line Essex. The experiment was repeated three times and similar results were obtained. Five plants per line were used for each experiment. Asterisks indicate significant differences between the tested lines in the presence and absence (C) of SCN infection as determined by ANOVA (\*\*\*\*  $P < .0001$ , \*\*  $P < .01$ , \*  $P < .05$ ).

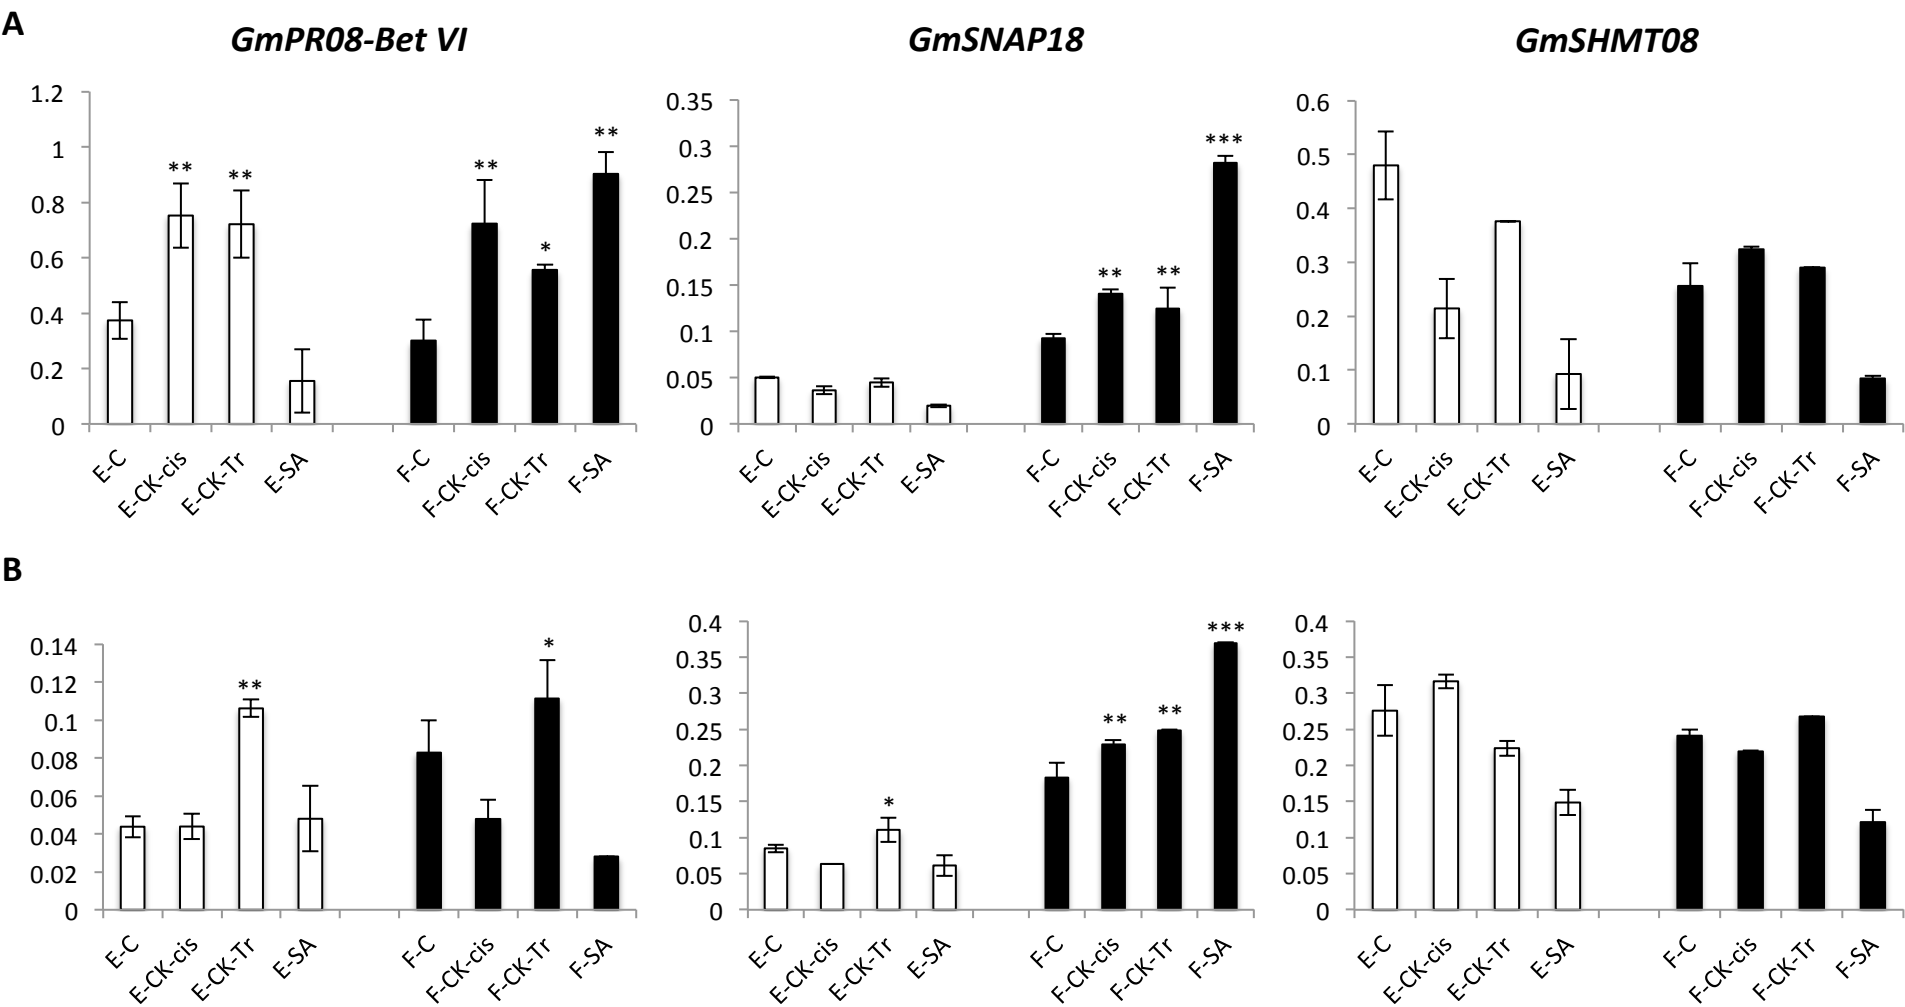

**Supplementary Figure 12. Expression analysis of the *GmPR08-Bet VI*, *GmSNAP18*, and *GmSHMT08* under exogenous SA and CKs treatments.** Treatments were carried out after (A) 12h and after (B) 24h using both phytohormones in Forrest and Essex soybean lines. The experiments were repeated three times and similar results were obtained. Five plants per line were used for each experiment. Asterisks indicate significant differences between the tested lines in the presence and absence (C) of SCN infection as determined by ANOVA (\*\*\*\*  $P < .0001$ , \*\*  $P < .01$ , \*  $P < .05$ ). CK-cis corresponds to zeatin-cis, and CK-Tr corresponds to zeatin-trans.

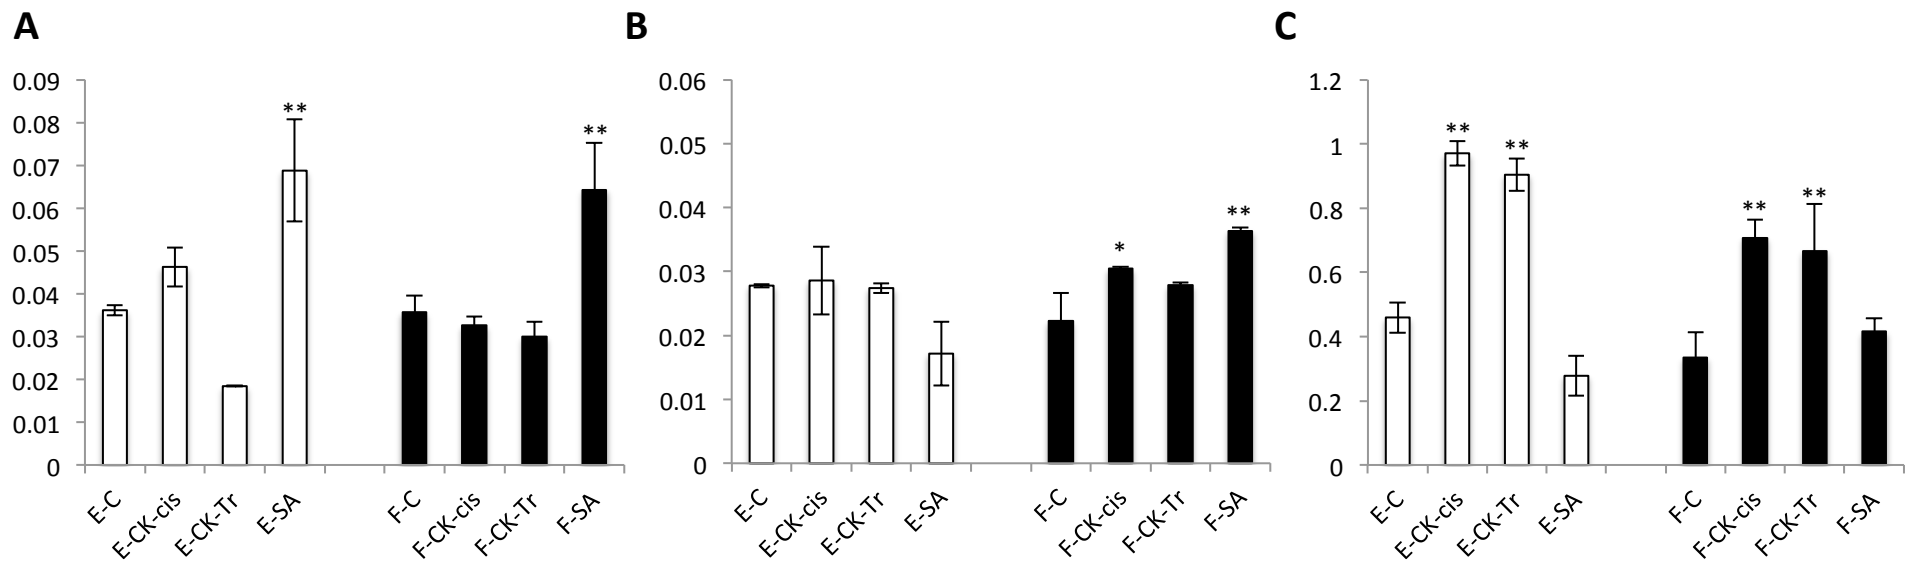

**Supplementary Figure 13. Expression analysis of the (A) *GmNPR1.2-09*, (B) *GmTGA2-13*, and (C) *GmARR03* genes under exogenous SA and CKs treatments.** Hormone treatments have been carried out after 12h in both Forrest and Essex soybean lines. The experiments were repeated three times and similar results were obtained. Five plants per line were used for each experiment. Asterisks indicate significant differences between the tested lines in the presence and absence (C) of SCN infection as determined by ANOVA (\*\*  $P < .01$ , \*  $P < .05$ ). CK-cis corresponds to zeatin-cis, and CK-Tr corresponds to zeatin-trans.

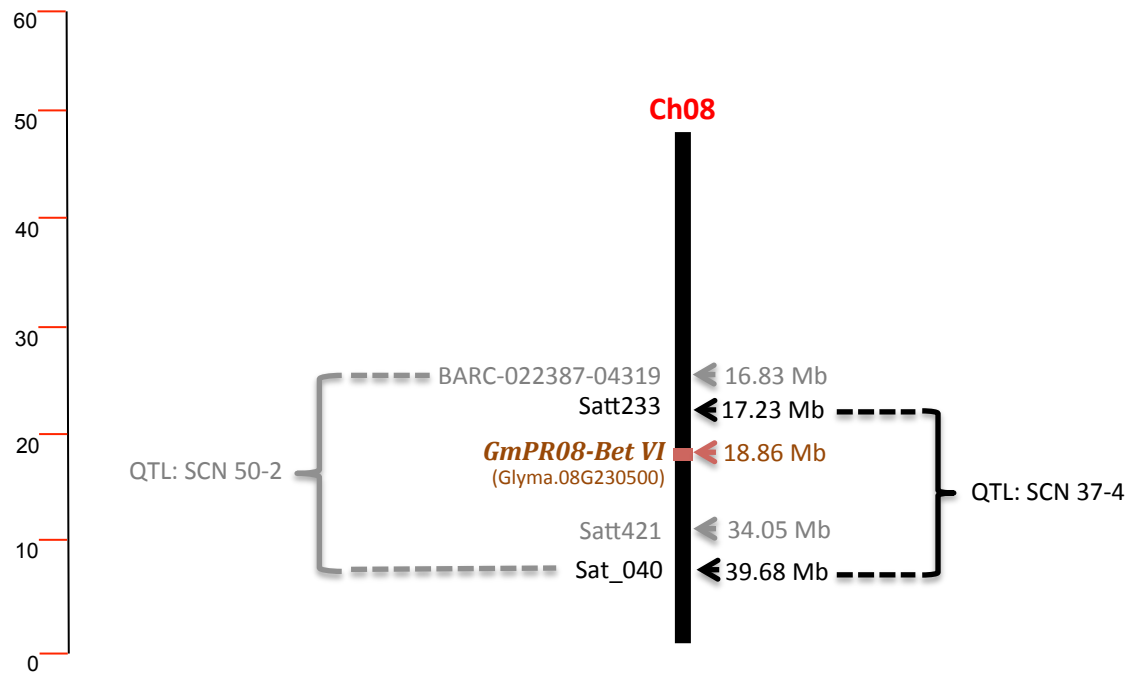

**Supplementary Figure 14. Physical positions corresponding to *GmPR08-Bet VI* and the two identified SCN QTLs at chromosome 08 are shown.** Glyma.08G230500 (Chr08: 18,862,371 - 18,864,962); QTL: SCN 37-4 (Gm08:17232368 - Gm08:39682787) (Vuong et al. 2010); and QTL: SCN 50-2 (Gm08:16839299 – Gm08:34051964) (Swaminathan et al., 2018).



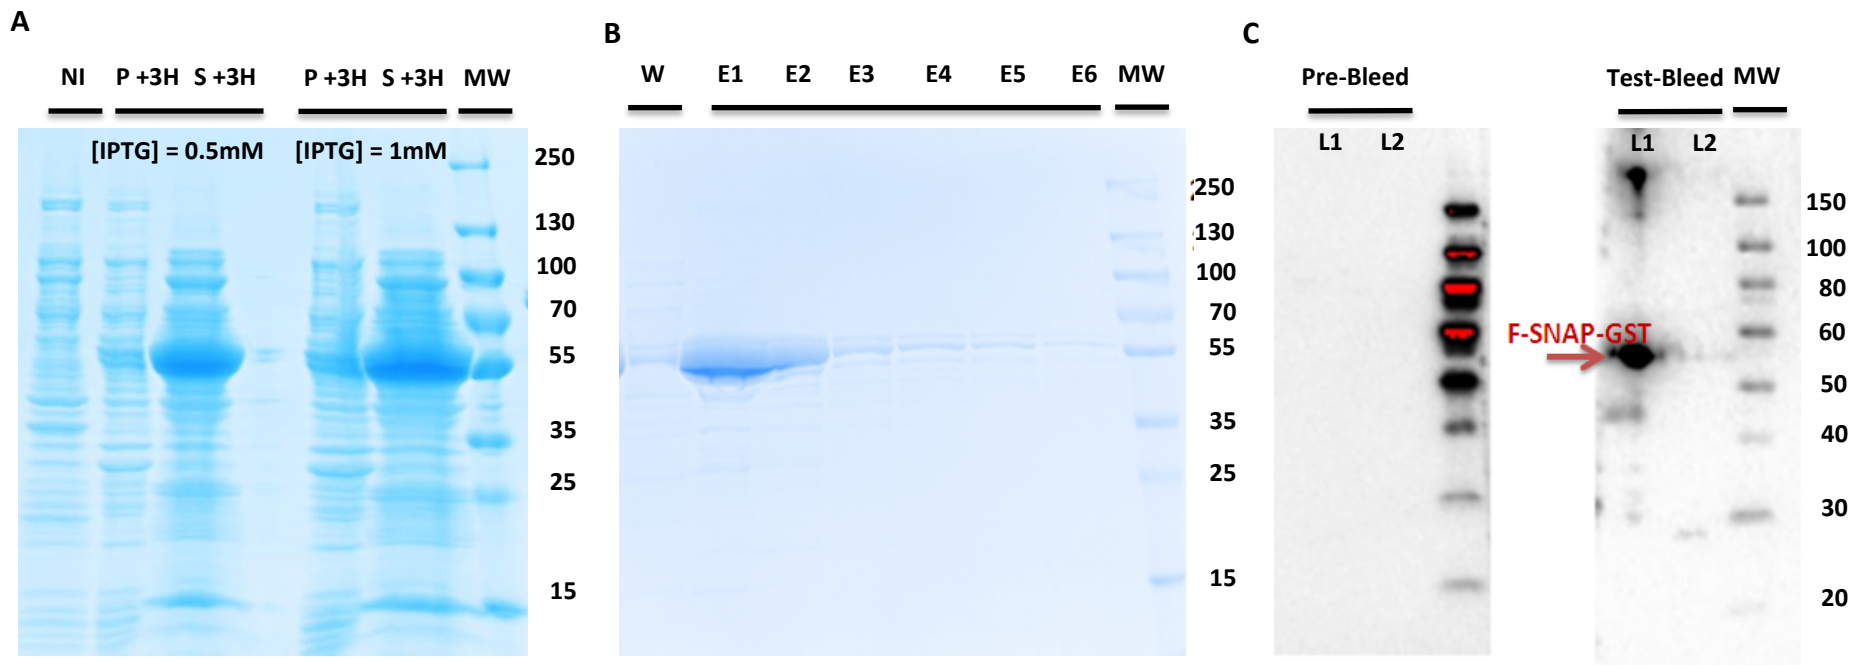

**Supplemental Figure 15. *In vivo* assays of GmSNAP18 recombinant protein in *E. coli*, Antibody Anti-GmSNAP18 production in Rabbit and confirming the specificity of custom-generated anti-GmSNAP18 antibodies.** (A) Recombinant *pGEX-5x-1::GmSNAP18-GST* protein expressed in *E. Coli* strain BL21. Left represent induction with [IPTG] = 0.5 mM and right [IPTG] = 1mM. Dilution 1/100 LB (50 mL) Amp or Cam-Amp, grow until OD600nm = 0.5. Sample at t = 0 (non induced) and 3h induction (Pellet and Supernatant) were revealed in SDS PAGE. (B) GST-tagged proteins purification with Glutathione resin (GE). Up to six eluted fractions were performed. Proteins from elution 6 were injected into Rabbits. (C) Western-Blot using Rabbit Pre-Bleed (Serum before injecting the purified GmSNAP18 (-1h)) and Test-Bleed (Serum 45 days after injection). Lane 1 = 50 ng purified GST-AB, Lane 2 = 50 ng control purified GST. (NI) Non-induced, (P) Pellet, (S) Supernatant, (MW) Molecular weight in KDa, (W) Wash, (E) Elution, (L) Lane.



**Supplemental Table 2.** The primers used for genotyping, sequencing, subcloning, qRT-PCR, and *in situ* analysis.

| Gene                 | Gene model             | Primers                                    | Primer Sequences                                                                                                     | Purpose                                              |
|----------------------|------------------------|--------------------------------------------|----------------------------------------------------------------------------------------------------------------------|------------------------------------------------------|
| GmSHMT08             | <i>Glyma.08g108900</i> | GmSHMT08-RT-Fw<br>GmSHMT08-RT-Rv           | TAACCTCGCCGTGTTCCCTT<br>TGTTTCGCGTAGGCCCTTAAA                                                                        | qRT-PCR                                              |
|                      |                        | GmSHMT08-Fw<br>GmSHMT08-Rv                 | ACAACACTCTCTCTTCTCGC<br>CAGATTATGAGTTTGGCCCTG                                                                        | Genotyping                                           |
|                      |                        | GmSHMT08-Fw<br>GmSHMT08-Rv                 | GGGGACAAGTTTGTACAAAAAAGCAGGCTTCATGGATCCAGTAAGCGTGTGGGGTA<br>GGGGACCACCTTTGTACAAGAAAGCTGGGTCATCCTTGTACTTCATTCAGATACC  | p35S-SHMT08<br>construct for<br>Agroinfiltration     |
| GmSNAP18             | <i>Glyma.18G022500</i> | GmSNAP18-RT-Fw<br>GmSNAP18-RT-Rv           | ACAAGGCTGGAGCGACATAC<br>AGCAATGTGCAGCATCGACA                                                                         | qRT-PCR                                              |
|                      |                        | GmSNAP18-Fw<br>GmSNAP18-Rv                 | CACTGTGTAAAGTTAATTTTTTGCTTAC<br>CCAATTCAATTAACCAAAGCAGG                                                              | Genotyping                                           |
|                      |                        | GmSNAP18-Fw<br>GmSNAP18-Rv                 | GGGGACAAGTTTGTACAAAAAAGCAGGCTCAATGGCCGATCAGTTATCGAAGGGAG<br>GGGGACCACCTTTGTACAAGAAAGCTGGGTCAGTAATAACCTCATACTCCTCAAGT | p35S-SNAP18::HA<br>construct for<br>Agroinfiltration |
|                      |                        | XmaI-SNAP-Fw<br>XhoI-SNAP- Rv              | AAACCCGGGAATGGCCGATCAGTTATCGAAGG<br>AAAACCTCGAGTCAAGTAATAACCTCATACTCC                                                | pGEX-5x-1-<br>GST::SNAP18 for<br>Antibodies          |
|                      |                        | Probe SNAP-Fw<br>Probe SNAP-Rv             | TGACATTTATGAAGAGATAGC<br>TTATAGCAACAACCTCT                                                                           | Probe for <i>In-situ</i>                             |
| <i>GmPR08-Bet VI</i> | <i>Glyma.08G230500</i> | GmPR08-Bet VI-RT-Fw<br>GmPR08-Bet VI-RT-Rv | AGTTCATCTTTCAAGCCATTGATGATA<br>CCTCACGAAGCCTCTCGTATT                                                                 | qRT-PCR                                              |
| <i>GmNPR1.09</i>     | <i>Glyma.09G064700</i> | GmNPR1.09-RT-Fw<br>GmNPR1.09-RT-Rv         | GGACCTGTACATGCCCGAAA<br>CCAGTTCACATCGCCGAA                                                                           | qRT-PCR                                              |
| <i>GmNPR1.2.15</i>   | <i>Glyma.15G127200</i> | GmNPR1.2.15-RT-Fw<br>GmNPR1.2.15-RT-Rv     | GGAATCCATTGGCTGGGGAT<br>TGCCACTCTGTTCTCAAGGT                                                                         | qRT-PCR                                              |
| <i>GmSAMT1.02</i>    | <i>Glyma.02G054200</i> | GmSAMT1.02-RT-Fw<br>GmSAMT1.02-RT-Rv       | GCTGTGGCAGAACCTATGCT<br>GCCAAGATTTGCTGGTAGCG                                                                         | qRT-PCR                                              |
| <i>GmTGA2.13</i>     | <i>Glyma.13G193700</i> | GmTGA2.13-RT-Fw<br>GmTGA2.13-RT-Rv         | TCGCCAGCAAACCTCTCAAC<br>GTATAGCAAGGAGTGCGCCGA                                                                        | qRT-PCR                                              |
| <i>GmPRXD16</i>      | <i>Glyma.16G164400</i> | GmPRXD16-RT-Fw<br>GmPRXD16-RT-Rv           | AGGAGGCCCTGATTTTGACG<br>AGAATGGTGCCGGTAGGTTG                                                                         | qRT-PCR                                              |
| <i>GmPKR19</i>       | <i>Glyma.19G193100</i> | GmPKR19-RT-Fw<br>GmPKR19-RT-Rv             | CCCCGAGCACCCAAATGTTA<br>GTTTAATCTCGGCAGCCCCT                                                                         | qRT-PCR                                              |
| <i>GmUbiquitin</i>   | <i>Glyma.20G141600</i> | GmUBI20-RT-Fw<br>GmUBI20-RT-Rv             | GTGTAATGTTGGATGTGTTCCC<br>ACACAATTGAGTTCAACACAAACCG                                                                  | qRT-PCR                                              |
